# Supplementary material
Source: Research Square preprint supplement (doi:10.21203/rs.3.rs-9113519/v1)

## QUESTIONNAIRE

You are kindly requested to assist in answering the questions below. The questions will be asked in order of the study objectives. The information will be used for academic work only and will be treated with strict confidentiality.

### SECTION A: Social demographic characteristics of respondents

Tick the correct answer from the alternatives and explain where necessary

1. Age of the respondent in years

a. Between 16-17 years

b. Between 18-19 years

2. Tribe of the respondent

a. Musoga

b. Muganda

c. Samia

d. Others (Specify).....

3. Religion of respondent

a. Anglican

b. Catholic

c. Muslim

d. Other (Specify).....

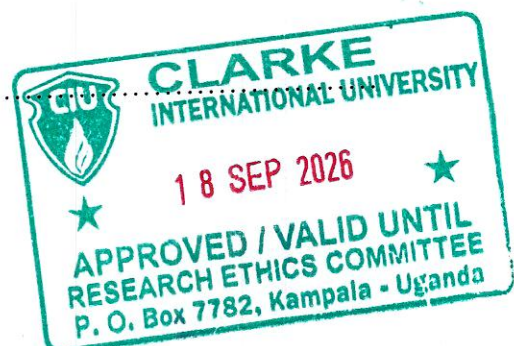

4. Respondent level of Education

a. Senior four

b. Senior five

c. Senior six

6. Whom do you stay with?

a. Both parents

b. Mother alone

c. Father alone

d. Others (specify) .....

**SECTION B: UTILIZATION OF SOCIAL MEDIA BY SECONDARY SCHOOL ADOLESCENTS**

1. Do you own a smart phone?

a. Yes

b. No

2. If no, do you have access to a smart phone?

a. Yes

b. No

3. Do you have access to a computer?

a. Yes

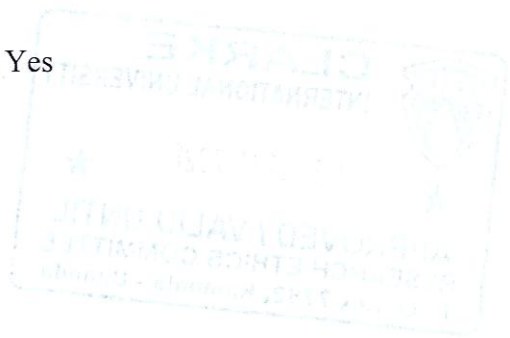

b. No

4. Are you using social media?

a. Yes

b. No

5. Which social media account(s) do you have? Tick your choice

Facebook

Twiter (x)

Whatsapp

Tiktok

Instagram

Others (specify).....

6. What social media sites do you often use? Tick your choice

Facebook

Twitter (x)

Whatsapp

Tiktok

Instagram

Others (specify).....

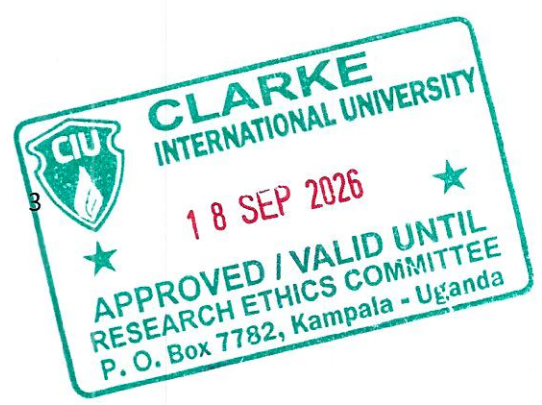



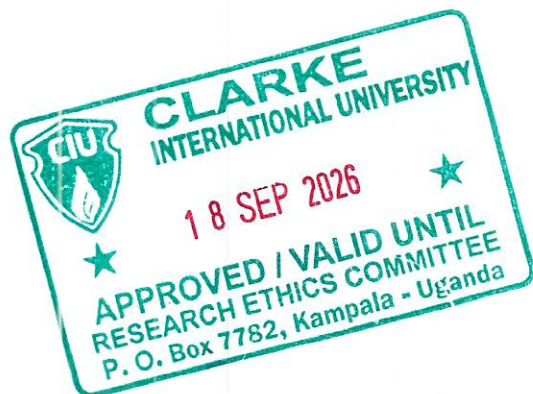

7. What is your favorite social media site?

Facebook

Twitter (x)

Whatsapp

Tiktok

Instagram

Others (specify).....

8. How did you learn about the use of social media?

Teacher

Friend

School

Parent/ guardian

Self

Other (specify) .....

9. What do you like most about social media? Tick your answer

Learning about my body

Watching videos

Holding a conversation

Sharing experiences

Learning new ideas

Making new friends

Listening to music

Staying up to date with current world events

A positive outlook on life

10. Are your peers also actively on social media?

a. Yes

b. No

**SECTION C: TIME SPENT BY SECONDARY SCHOOL ADOLESCENTS ON SOCIAL MEDIA**

1. How often do you use social media sites?

Everyday

On weekends

Three times a week

Once a month

Others (specify).....

2. How much time do you spend on social media?

Less than one hour

1 hour

1-2 hours

More 4 hours

3. What determines the amount of time you spend on social media?

Likes I get

Comments from viewers

Number of followers

The content I watch

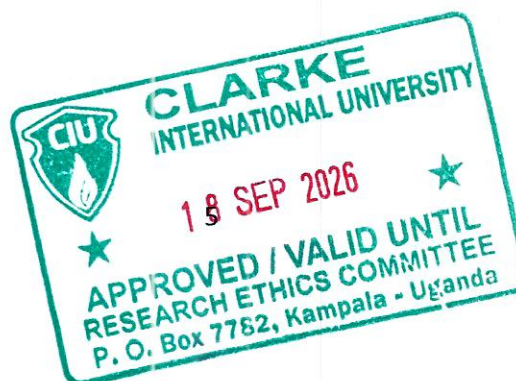

Availability on internet

4. Are teenagers addicted to using social media?

a. Yes

b. No

If yes, explain your answer?

.....

5. Have you tried online dating?

a. Yes

b. No

6. Have you watched any pornographic video?

a. Yes

b. No

**SECTION D: EFFECT OF SOCIAL-MEDIA ON SEXUAL BEHAVIOUR OF  
SECONDARY SCHOOL ADOLESCENTS?**

1. How does social media affect your behaviour?

a) Negatively

b) Positively

2. If positively, to what extent does social media affect your behaviour?

Learning new ideas

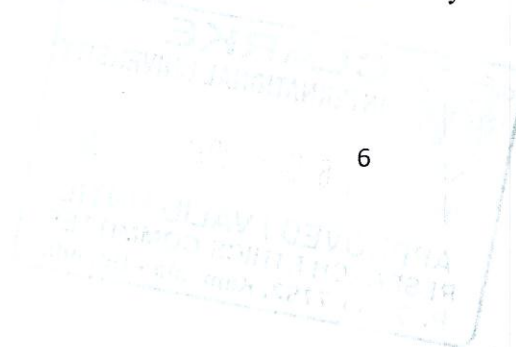

Marketing myself

Create and share with others

Access content others share,

Keep in touch with friends

Socially engage with people in different locations

Others (specify) .....

.....

2. If negatively, to what extent does social media affect your behaviour? Tick your choice

| RESPONSE                   | Not at all | Some extent | Great extent |
|----------------------------|------------|-------------|--------------|
| Addiction to pornography   |            |             |              |
| Masturbation               |            |             |              |
| Promotes indecent dressing |            |             |              |
| Stimulates sexual desires  |            |             |              |

THANK YOU

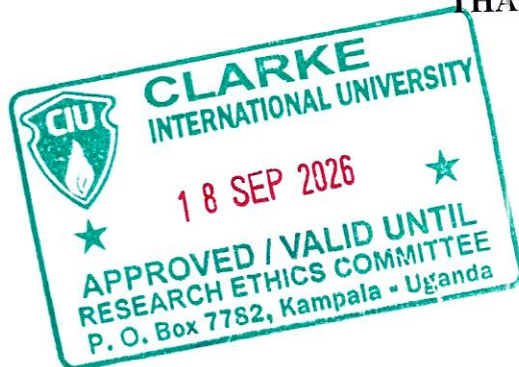

Supplement: Supplementary file 1 [file c3ad2125f4e0b56a789781a5.pdf]
